# Supplementary material for: Estimation of oceanic sub-surface mixing under a severe cyclonic storm using a coupled atmosphere-ocean-wave model
Source: Copernicus journal article supplement (doi:10.5194/os-2017-83), 2017-10-10
Supplement: Supplementary file [file os-2017-83-AC1-supplement.pdf]

1           **Estimation of oceanic sub-surface mixing under a severe cyclonic storm**  
2                           **using a coupled atmosphere-ocean-wave model**

3                           Kumar Ravi Prakash, Tanuja Nigam, Vimlesh Pant

4           Centre for Atmospheric Sciences, Indian Institute of Technology Delhi, New Delhi-110016

6   **Abstract**

7           A coupled atmosphere-ocean-wave model used to examine mixing in the upper oceanic  
8 layers under the influence of a very severe cyclonic storm Phailin over the Bay of Bengal (BoB)  
9 during 10-14 October 2013. Model simulations highlight prominent role of cyclone induced near-  
10 inertial oscillations in sub-surface mixing up to the thermocline depth. The inertial mixing  
11 introduced by the cyclone played a central role in deepening of the thermocline and mixed layer  
12 depth by 40 m and 15 m, respectively. A detailed analysis of inertial oscillation kinetic energy  
13 generation, propagation, and dissipation was carried out at a location in northwestern BoB. ~~The~~  
14 ~~peak magnitude of kinetic energy in baroclinic and barotropic currents found to be  $1.2 \text{ m}^2 \text{ s}^{-2}$  and~~  
15  ~~$0.3 \times 10^{-2} \text{ m}^2 \text{ s}^{-2}$ , respectively. The power spectrum analysis suggested a dominant frequency~~  
16 ~~operative in sub-surface mixing was associated with near inertial oscillations. The peak strength~~  
17 ~~of  $0.84 \text{ m}^2 \text{ s}^{-1}$  in zonal baroclinic current found at 14 m depth. The baroclinic kinetic energy remain~~  
18 ~~higher ( $> 0.03 \text{ m}^2 \text{ s}^{-2}$ ) during 11-12 October and decreased rapidly thereafter. The wave number~~  
19 ~~rotary spectra identified the downward propagation, from surface up to the thermocline, of energy~~  
20 ~~generated by inertial oscillations. A quantitative analysis of shear generated by the near inertial~~  
21 ~~baroclinic current showed higher shear generation at 40-80 m depth during peak surface winds.~~  
22 ~~Analysis highlights that greater mixing within the mixed layer take place where the eddy kinetic~~  
23 ~~diffusivity was high ( $> 6 \times 10^{11} \text{ m}^2 \text{ s}^{-1}$ ). The turbulent kinetic energy dissipation rate increased from~~  
24  ~~$4 \times 10^{-14}$  to  $2.5 \times 10^{-13} \text{ W kg}^{-1}$  on approaching the thermocline that dampened mixing process further~~  
25 ~~downward into the thermocline layer. Large shear generated by the inertial oscillations found to~~  
26 ~~overcome the stratification and initiate mixing at the base of the mixed layer. Greater mixing was~~  
27 ~~found at the depths where the eddy kinetic diffusivity was large. The baroclinic current, holding a~~  
28 ~~larger fraction of kinetic energy than the barotropic current, weakened rapidly after the passage of~~  
29 ~~cyclone. The shear-induced by inertial oscillations found to decrease rapidly with increasing depth~~  
30 ~~below the thermocline. The dampening of mixing process below the thermocline explained~~

31 through the enhanced dissipation rate of turbulent kinetic energy upon approaching the  
32 thermocline layer. The wave-current interaction, non-linear wave-wave interaction were found to  
33 affect the process of downward mixing and cause the dissipation of inertial oscillations.

## 36 1. Introduction

37 The Bay of Bengal (BoB), a semi-enclosed basin in the northeastern Indian ~~Ocean~~ ocean,  
38 consists of surplus near-surface fresh water due to large precipitation and runoff from the major  
39 river systems of the Indian subcontinent (Varkey et al., 1996; Rao and Sivakumar, 2003; Pant et  
40 al., 2015). Presence of fresh water leads to salt-stratified upper ocean water column and formation  
41 of barrier layer (BL), a layer sandwiched between bottom of the mixed layer (ML) and top of the  
42 thermocline, in the BoB (Lukas and Lindstrom, 1991; Vinayachandran et al., 2002; Thadathil et  
43 al., 2007). The BL restricts entrainment of colder waters from thermocline region into the mixed  
44 layer thereby, maintains warmer ML and sea surface temperature (SST). The warmer SST together  
45 with higher tropical cyclone heat potential (TCHP) makes the BoB as one of the active regions for  
46 cyclogenesis (Suzana et al. 2007; Yanase et al. 2012, Vissa et al. 2013). Majority of tropical  
47 cyclones generate during the pre-monsoon (April-May) and post-monsoon (October-November)  
48 seasons (Alam et al., 2003; Longshore, 2008). The number of cyclones and their intensity is highly  
49 variable in seasonal and interannual time scales. The stratification of the ~~Ocean~~ ocean is one of the  
50 important factor~~s~~s to drive the ocean response of the tropical cyclone. The BL formation in the BoB  
51 is associated with the strong stratification due to the peak discharge from rivers in the post-  
52 monsoon season. The intensity of the cyclone largely depend~~s~~s on the degree of stratification (Neetu  
53 et al. 2012; Li et al. 2013).

54 Mixing in the water column has an important role in energy and material transference.  
55 Mixing in the ocean can be introduced by the different agents such as wind, current, tide, eddy,  
56 and cyclone. Mixing due to tropical cyclones is mostly limited to the upper ocean but the cyclone-  
57 induced internal waves can affect the subsurface mixing. Several studies have observed that the  
58 mixing in the upper oceanic layer is introduced due to the generation of near-inertial oscillations  
59 (NIO) during the passage of tropical cyclones (Gonella, 1971; Shay et al., 1989; Johanston et al.,

60 2016). This mixing is responsible for deepening of ML and shoaling of the thermocline (Gill,  
61 1984). The vertical mixing caused by storm-induced NIO has a significant impact on the upper  
62 ocean variability (Price, 1981). The NIO are also found to be responsible for the decrement of SST  
63 along the cyclone track (Chang and Anthes, 1979; Leipper, 1967; Shay et al., 1992; Shay et al.,  
64 2000). This decrease in SST is caused by the entrainment of cool subsurface thermocline water in  
65 the mixed layer into the immediate overlying layer of water. This cooling of surface water is one  
66 of the components of the decaying mechanism of the stormy event (Cione and Uhlhorn, 2003).  
67 There is a remarkable difference in the magnitude of this cooling of surface temperature moving  
68 on the highly stratified to less or weakly stratified bay locations those are falling at the rightward  
69 to the cyclone track (Jacob, 2003; Price et al., 1981).

70 The near-inertial process can be analyzed from the baroclinic component of currents. The  
71 vertical shear of horizontal baroclinic velocities that is interrelated to buoyancy oscillations of  
72 surface layers ~~are is~~ utilized in various studies to have an adequate understanding of the mixing  
73 associated with high frequency oscillations i.e. NIO (Zhang et al., 2014). The shear generated due  
74 to NIO is an one of the important factor ~~other than the wind stress~~ for the intrusion of the cold  
75 thermocline water into the ML during near-inertial scale mixing (Price et al., 1978; Shearman,  
76 2005; Burchard and Rippeth, 2009). The alternative upwelling and downwelling features of the  
77 temperature profile are an indication of the inertial mixing. The Kinetic energy bounded with these  
78 components of current shows a rise in magnitude at the right side of cyclone track (Price et al.,  
79 1981; Sanfoard et al., 1987; Jacob, 2003). The reason for this high magnitude of kinetic energy is  
80 linked with strong wind and rotating wind vector condition of the storm.

81 In several studies (Chang et al., 2008; Lin et al., 2008; Shang et al., 2008; Lin et al., 2003;  
82 Zhao et al., 2009), upper ~~Ocean~~ ocean response for various cyclonic events is also inspected and  
83 proved for the enhancement of primary productivity during post-cyclone state of the ~~Ocean~~ ocean.  
84 At the time when a storm is active and prior to it, the surface concentration of chlorophyll-a (Chl-  
85 a), a proxy for the concentration of primary productivity is comparatively lower than that of the  
86 post-cyclonic state of the ocean surface (Sarangi, 2011, Latha et al., 2015). This increment in the  
87 chlorophyll is dependent on the relative entrainment of the cool subsurface water, enriched in  
88 nutrient under the influence of energetic near-inertial wave mixing caused by the tropical  
89 cyclones.

90 ~~The Aim~~aim of this paper is to understand and quantify the near-inertial mixing due to the  
91 Phailin, a very severe cyclonic storm (VSCS) in the BoB. The study also focuses on analyzing the  
92 subsurface distribution of NIO with its vertical mixing potential. Further, the study quantifies the  
93 shear generated mixing and the kinetic energy of these baroclinic mode of horizontal current  
94 varying in the vertical section at a selected location during the active period of the cyclone. The  
95 dissipation rate of NIO and turbulent eddy diffusivity are quantified.

## 96 2. Data and Methodology

### 97 2.1 Model details

98 Numerical simulations during the period of VSCS Phailin were carried out using the  
99 coupled ~~Ocean Atmosphere wave Sediment~~—ocean-atmosphere-wave-sediment transport  
100 (COAWST), described in detail by Warner et al. (2010). COAWST modeling system couples the  
101 three-dimensional oceanic model 'Regional Ocean Modeling System' (ROMS), the atmospheric  
102 model 'Weather Research and Forecasting' (WRF), and the wind wave generation and propagation  
103 model 'Simulating Waves Nearshore' (SWAN). ROMS model used for the study is a free surface,  
104 primitive equation, sigma coordinate model. ROMS is a hydrostatic ocean model that solves finite  
105 difference approximations of the Reynolds averaged Navier-Stokes equations (eChassignet et al  
106 2000; Haidvogel et al. 2000, Haidvogel et al. 2008; Shchepetkin and McWilliams 2005). The  
107 atmospheric model component in the COAWST is a non-hydrostatic, compressible model  
108 'Advanced Research Weather Research Forecast Model' (WRF-ARW), described in Skamarock  
109 et al., (2005). It has different schemes for representation of boundary layer physics and physical  
110 parameterizations of sub-grid scale processes. In the COAWST modeling system, appropriate  
111 modifications were made in the code of atmospheric model component to provide an improved  
112 bottom roughness from the calculation of the bottom stress over the ocean (Warner et al., 2010).  
113 Further, the momentum equation is modified to improve the representation of surface waves. The  
114 modified equation needs the additional information of wave energy dissipation, propagation  
115 direction, wave height, wave-length that are obtained from wave component of the COAWST  
116 model.

117 The spectral wave model SWAN, ~~used in the COAWST modeling system~~, is designed for shallow  
118 water. The wave action balance equation is solved in the wave model for both spatial and spectral  
119 spaces (Booij et al. 1999). ~~In the COAWST, the ocean model ROMS simulated free surface~~

120 elevations (ELV), and current (CUR) are provided to the wave model SWAN. The Kirby and Chen  
121 (1998) formulation has been used for the computation of current. The Model Coupling Toolkit  
122 (MCT) used as a coupler in the COAWST modeling system to couple different model components  
123 (Larson et al., 2004; Jacob et al., 2005). A parallel-coupled approach is utilized by the coupler that  
124 permits the transmission and transformation of various distributed parameters between component  
125 models. MCT coupler facilitates exchanges of prognostic variables from one model to another  
126 model components. Further details on various parameters exchanged among the component  
127 models of COAWST modeling system can be found in Warner et al. (2010). The SWAN model used  
128 in the COAWST system includes the wave-wind generation, wave-breaking, wave-dissipation, and  
129 nonlinear wave-current-wind interaction. The 'Model Coupling Toolkit' (MCT) used as a coupler in the  
130 COAWST modeling system to couple different model components (Larson et al., 2004; Jacob et al., 2005).  
131 The coupler utilizes a parallel-coupled approach to facilitate the transmission and transformation of various  
132 distributed parameters among component models. MCT coupler exchanges prognostic variables from one  
133 model to another model component as shown in Figure 1. The WRF model receives sea surface temperature  
134 (SST) from the ROMS model and supplies the zonal (Uwind) and meridional (Vwind) components of 10-  
135 m wind, atmospheric pressure (Patm), relative humidity (RH), cloud fraction (Cloud), precipitation (Rain),  
136 shortwave (Swrad) and longwave (Lwrad) radiation to the ROMS model. The SWAN model receives  
137 Uwind and Vwind from the WRF model and transfers significant wave height (Hwave) and mean  
138 wavelength (Lmwave) to the WRF model. A large number of variables are exchanged between ROMS and  
139 SWAN models. The ocean surface current components (Us, Vs), free surface elevations ( $\eta$ ), and bathymetry  
140 (Bath) provided to the SWAN from ROMS model. The wave parameters i.e. Hwave, Lmwave, peak  
141 wavelength (Lpwave), wave direction (Dwave), surface wave period (Tpsurf), bottom wave period  
142 (Tmbott), percentage wave breaking (Qb), wave energy dissipation (DISSwcap), and bottom orbit velocity  
143 (Ubot) provided from the SWAN to ROMS model through the MCT coupler. Further details on the  
144 COAWST modeling system can be found in Warner et al. (2010).

Formatted: Indent: First line: 1.27 cm

## 147 2.2 Model configuration and experiment design

148 The coupled model was configured over the BoB to study the VSCS Phailin during the  
149 period of 10 to 15 October 2013. The setup of COAWST modeling system used in this study  
150 included fully coupled atmosphere-ocean-wave (ROMS+WRF+SWAN) models but the sediment

151 transport is not included. A non-hydrostatic, fully compressible atmospheric model with a terrain-  
152 following vertical coordinate system, WRF-ARW (version 3.7.1) was used in the COAWST  
153 configuration. The WRF model used with 9 km horizontal grid resolution over the domain 65 °E-105 °E,  
154 1°N-34 °N and 30 sigma levels in the vertical. WRF was initialized with ‘National Centre for Environmental  
155 Prediction’ (NCEP) ‘Final Analysis’ (FNL) data (NCEPFNL, 2000) at 00 GMT on 10th October 2013. The  
156 lateral boundary conditions in WRF were provided at 6 hour interval from the FNL data. The atmospheric  
157 ~~model~~—We used the parameterization schemes for calculating boundary layer processes,  
158 precipitation processes, and surface radiation fluxes. The Monin-Obukhov scheme of surface  
159 roughness layer parameterization (Monin and Obukhov 1954) was activated in the model. The  
160 Rapid Radiation Transfer Model (RRTM) and cloud-interactive shortwave (SW) radiation scheme  
161 from Dudhia (1989) were used. The planetary boundary layer scheme YSU-PBL, described by  
162 Noh et al. (2003), was used. At each time step, the calculated value of exchange coefficients and  
163 surface fluxes off the land or ocean surface by the atmospheric and land surface layer models  
164 (NOAH) passed to the YSU PBL. The Grid-scale precipitation processes were represented by  
165 WRF single-moment (WSM) six-class moisture microphysics scheme by Hong and Lim (2006).  
166 The sub-grid scale convection and cloud detrainment were taken care by Kain (2004) cumulus  
167 scheme.

168 A terrain following ocean model ROMS with 40 sigma levels in the vertical used in this  
169 study. The ROMS model domain used with zonal and meridional grid resolutions of 6 km and 4 km,  
170 respectively. This high resolution in ROMS enables to resolve mesoscale eddies in the ocean. The vertical  
171 starching parameters i.e.  $\theta_s$  and  $\theta_b$  were set at 7 and 2, respectively. The northern lateral boundary in ROMS  
172 was closed by the Indian subcontinent. The ROMS model observed open lateral boundaries in the west,  
173 east, and south in the present configuration. The initial and lateral open boundary conditions were derived  
174 from the ‘Estimating the Circulation and Climate of the Ocean, Phase II’ (ECCO2) data. The ocean  
175 bathymetry was provided from the 2-minute gridded global relief data (ETOPO2). There was no relaxation  
176 provided to the model for any correction in the temperature, salinity, and current fields. A terrain  
177 ~~following ocean model ROMS with 40 sigma levels used in this study.~~The Generic-Length-Scale  
178 (GLS) vertical mixing scheme parameterized as the K- $\epsilon$  model used (Warner et al., 2005). Tidal  
179 boundary conditions were derived from the TPXO.7.2 (ftp://ftp.oce.orst.edu/dist/tides/Global)  
180 data, which includes phase and amplitude of the M2, S2, N2, K2, K1, O1, P1, MF, MM, M4, MS4,  
181 and MN4 tidal constituents along the east coast of India. The tidal input was interpolated from

Formatted: Subscript  
Formatted: Subscript

182 TPXO.7.2 grid to ROMS computational grid. The Shchepetkin boundary condition (Shchepetkin,  
183 2005) for the barotropic current was used at open lateral boundaries of the domain which allowed  
184 the free propagation of astronomical tide and wind-generated currents. The domains of  
185 atmosphere and ocean models which were part of the COAWST modeling system are shown in  
186 Figure 24. ~~The domain for SWAN model was similar to the domain of ROMS model. The ROMS  
187 and SWAN were configured over the common model domain. The WAVE model (SWAN) was forced  
188 with the WRF computed wind field. We used 24 frequency (0.04 - 1.0 Hz) and 36 directional bands. The  
189 boundary conditions for SWAN was derived from the 'WaveWatch III' model. The atmospheric model  
190 WRF had 9 km horizontal grid resolution over the domain 65 °E-105 °E, 1°N-34 °N with 30 sigma  
191 levels in vertical. WRF was initialized with National Centre for Environmental Prediction (NCEP)  
192 Final Analysis (FNL) data (NCEP FNL, 2000) on 10<sup>th</sup> October 2013 at 00 GMT. Lateral boundary  
193 conditions in WRF provided at 6 h interval from the FNL data. The ROMS model domain had  
194 zonal and meridional grid resolutions of 6 km and 4 km, respectively. The northern lateral  
195 boundary in ROMS was closed and the model observed open boundaries in rest of the sides. The  
196 oceanic initial and lateral open boundary conditions were derived from the Estimating the  
197 Circulation and Climate of the Ocean, Phase II (ECCO2) data. Ocean bathymetry was derived  
198 from 2 minute gridded global relief data (ETOPO2). In the COAWST system, the free surface  
199 elevations (ELV) and current (CUR) simulated by ocean model ROMS are provided to the wave model  
200 SWAN. The Kirby and Chen (1998) formulation has been used for the computation of current. The surface  
201 wind applied to the SWAN model (provided by WRF) used in the Komen et al. (1984) closure model to  
202 transfer energy from the wind to wave field. The baroclinic time step used in ROMS model was 5 s. The  
203 SWAN and WRF models used with time steps of 120 s and 60 s, respectively. The coupled modeling  
204 system allows the exchange of prognostic variables among the atmosphere, ocean, and wave  
205 models at every 600 s. The SST simulation at high spatial and temporal resolutions enables  
206 accurate heat fluxes at the air-sea interface and exchange of heat between oceanic mixed layer and  
207 atmospheric boundary layer. The surface roughness parameter calculated in the WRF model based  
208 on Taylor and Yelland (2001), which involved parameters from the wave model. The Advanced  
209 Very High Resolution Radiometer (AVHRR) data was used for the validation of model simulated  
210 SST.~~

211

212

213 **2.3. Methodology**

214 The baroclinic current component was calculated by subtracting the barotropic component  
215 from the mean current with a resolution of 2 m in the vertical. The power spectrum analysis was  
216 performed on the zonal and meridional baroclinic currents along the depth section of the selected  
217 location by using periodogram method. The continuous wavelet transform using Morlet wavelet  
218 method carried out to analyze the temporal variability of the baroclinic current at a particular level  
219 of 14 m. The near-inertial baroclinic velocities were filtered by the Butterworth 2<sup>nd</sup> order scheme  
220 for the cutoff frequency range of 0.033 to 0.043. The filtered zonal ( $u_f$ ) and meridional ( $v_f$ ) inertial  
221 baroclinic currents were used to calculate the inertial baroclinic kinetic energy ( $E_i$ ) in  $m^2 s^{-2}$  and  
222 inertial shear ( $S_i$ ) following Zhang et al. (2014) using equation (1).

223 
$$S_f = \left(\frac{\partial u_f}{\partial z}\right)^2 + \left(\frac{\partial v_f}{\partial z}\right)^2 \quad (1)$$

224 As the stratification is a measure of oceanic stability, the buoyancy frequency ( $N$ ) was calculated  
225 using equation (2)

226 
$$N^2 = -\frac{g}{\rho} \frac{\partial \rho}{\partial z} \quad (2)$$

227 Where  $\rho$  is the density of sea-water and  $g$  is acceleration due to gravity.

228 The analysis of generation of the inertial oscillations and their dissipation was performed  
229 on the basis of turbulent dissipation rate ( $\epsilon$ ) and turbulent eddy diffusivity ( $k_\rho$ ). These parameters  
230 were calculated by using following formula (Mackinnon and Gregg, 2005; van der Lee and  
231 Umlauf, 2011; Palmer et al., 2008; Osborn, 1980)

232 
$$\epsilon = \epsilon_0 \left(\frac{N}{N_0}\right) \left(\frac{S_{if}}{S_0}\right) \quad (3)$$

233 
$$k_\rho = 0.2 x \left(\frac{\epsilon}{N^2}\right) \quad (4)$$

234 Where  $S_{if}$  is the low shear background velocity, Values of  $N_0 = S_0 = 3$  cycle per hour and  $\epsilon_0 =$   
235  $10^{-8} W kg^{-1}$ .

236

237



### 238 3. Results and Discussion

#### 239 3.1. Details of VSCS Phailin

240 Phailin, a very severe cyclonic storm (VSCS) was developed over the BoB in ~~the~~ northern  
241 Indian ~~Ocean~~ ocean in October 2013. The landfall of Phailin occurred on 12 October 2013 around  
242 15:30 GMT near Gopalpur district of Odisha state ~~at~~ on the east coast of India. After the 1999  
243 super cyclonic event of the Odisha coast, Phailin was the second strongest cyclonic event that  
244 made ~~landfall at~~ landfall on the east coast of India (Kumar and Nair, 2015). The low-~~pressure~~  
245 system developed in the north of the Andaman Sea on 7<sup>th</sup> October 2013, which transformed into a  
246 depression on 8<sup>th</sup> October at 12 °N, 96 °E. This depression got converted to a cyclonic disturbance  
247 on 9<sup>th</sup> October and further intensified while moved to east-central BoB and opted the maximum  
248 wind speed of 200 km h<sup>-1</sup> at 03:00 GMT on 11<sup>th</sup> October. Finally, landfall occurs s at 17:00 GMT  
249 12<sup>th</sup> October. More details on the development and propagation of VSCS Phailin can be found in  
250 the literature (IMD Report, 2013; Mandal et al. 2015; Prakash and Pant, 2017).

251

#### 252 3.2 Validation of coupled model simulations

253 The WRF model simulated track of Phailin was validated against the India Meteorological  
254 Department (IMD) reported best-track of the cyclone. A comparison of model simulated track with  
255 the IMD track is shown in Figure 32. Solid circles marked on both the tracks represent the 6-hourly  
256 positions of the cyclone's center, as identified by the minimum surface pressure. WRF model in  
257 the coupled configuration does a fairly good job in simulating the track, translational speed, and  
258 landfall location of Phailin. The positional track error was about 40 km when compared to IMD  
259 track of Phailin. The ROMS model simulated SST ~~was~~ validated against the Advanced Very High  
260 Resolution Radiometer (AVHRR) satellite data on each day for the period of Phailin passage over  
261 the BoB. Figure 43 shows that the coupled model simulations are capturing the SST features as  
262 well as the magnitude of cooling associated with the storm. The maximum cooling of the sea  
263 surface observed on 13<sup>th</sup> October in the northwestern BoB in both, model and observations. This  
264 post-cyclone cooling primarily associated with the cyclone-induced upwelling resulting from the  
265 surface divergence driven by the Ekman transport. Thus, the coupled model is reproducing  
266 dynamical processes and vertical velocities reasonably well.

### 267 3.3. Cyclone induced mixing

268 The coupled atmosphere-ocean-wave simulation is an ideal tool to understand air-sea  
269 exchange of fluxes and their effects on the oceanic water column. Surface wind sets up currents  
270 on the surface as well as initiate mixing in the interior of the upper ocean. In order to examine the  
271 strength of mixing due to VSCS Phailin, the model simulated vertical temperature profile together  
272 with the zonal and meridional components of windcurrent at a location 18.75 °N, 86.66 °E are  
273 plotted in Figure 54. The Ftemperature of the upper surface water (25 m -30 m) decreased by 3.5°C  
274 from its maximum value of 28 °C after the landfall of the cyclone on 12-13<sup>th</sup> October (Figure  
275 54a). In response to the strong cyclonic winds, the depth of 23 °C isotherm (D23) deepening from  
276 50 m to 90 m was observed during 04-12 GMT on 12 October. At the same time, the mixed layer  
277 depth (MLD), denoted by a thick black line in Figure 5a, deepens by about 15 m. Based on the  
278 density criteria, we calculated MLD as the depth where density increased by 0.125 kg m<sup>-3</sup> from its  
279 surface value. The inertial mixing introduced by the cyclone play central role in deepening of D23  
280 and MLD on 12<sup>th</sup> October 2013. The warmer near-surface waters mixed downward when the  
281 cyclone crossed over this location. After the passage of cyclone, shoaling of D23 and MLD  
282 observed as a consequence of cyclone induced upwelling that entrain colder waters from the  
283 thermocline into the mixed layer. To examine the role of cyclone induced mixing in modulating  
284 the thermohaline structure of upper ocean, we carried out further analysis on the coupled model  
285 simulations as discussed in the following sections.

286

#### 287 3.3.1. Kinetic energy distribution

288 During the initial phase of VSCS Phailin, the zonal and meridional currents were primarily  
289 westward and southward, respectively (Figures 45b, 45c). However, on and after 12<sup>th</sup> October  
290 when cyclone attains peak intensity and crosses over the location, alternative temporal sequences  
291 of westward/eastward-~~movement~~ in zonal current and southward/northward-~~flow~~ in meridional  
292 current were noticed in current profiles (Figures 45b, 45c). The Ffrequency of these reversals in  
293 zonal and meridional currents are recognized as near-inertial frequency generated from the storm  
294 at this location (18.75 °N, 86.66 °E). The direction and magnitude of currents represent a  
295 variability within 16-24 hr that corresponds to the near-inertial time period for the selected  
296 location. Kinetic energy (KE) of currents at various depths is a proxy of energy available in the

Formatted: Superscript

297 water column that becomes conducive ~~for~~to turbulent and inertial mixing. Time series of KE  
298 associated with the barotropic and depth-averaged baroclinic components of current at the point  
299 location (18.75° N, 86.66° E) ~~are is~~ illustrated in Figure 45d. The KE associated with the baroclinic  
300 component found to be much higher than the barotropic component of current. The depth-  
301 averaged baroclinic and barotropic current components' KE also depict the impinging oscillatory  
302 behavior. The peak magnitude of KE in baroclinic and barotropic currents found to be  $1.2 \text{ m}^2 \text{ s}^{-2}$   
303 and  $0.3 \times 10^{-2} \text{ m}^2 \text{ s}^{-2}$ , respectively on 12<sup>th</sup> October at 08:00 GMT. It is worth noting that the time of  
304 peak KE in baroclinic currents (Figure 5d) coincide with the deepening of MLD and D23 (Figure  
305 5a). Therefore, the KE generated in NIO is responsible for sub-surface mixing that acts to deepen  
306 the mixed layer. The analysis suggests that energy available for mixing process in the water column  
307 was mostly confined ~~in~~to the baroclinic currents at various depths.

### 309 3.3.2. Primary frequency and depth of mixing

310 The power spectrum analysis was performed on the time series profiles at selected point  
311 location (18.75 °N, 86.66 °E) to get a distribution of all frequencies operating in the mixing process  
312 during the passage of cyclone. As found in the previous section, the KE associated with baroclinic  
313 currents are dominated over the barotropic currents, the power spectrum analysis performed on  
314 zonal and meridional components of the baroclinic current profile is shown in Figure 56. It is clear  
315 from Figure 56 that tidal (M2, the semidiurnal component of tide) and near-inertial oscillations (f)  
316 are two dominant frequencies on the surface during the cyclone Phailin. ~~Further, the near inertial~~  
317 ~~frequency is smaller than the tidal frequency on the surface.~~ To analyze the mixing potential of the  
318 NIO, power spectrum method was applied ~~at~~to the profile of baroclinic current component (~~Figure~~  
319 ~~5~~). The largest power of the NIO was noticed at 14 m depth but the tidal oscillations were absent  
320 along the whole vertical section of baroclinic current (Figure 6). This finding motivated us to  
321 analyze the significance and distribution of ~~these~~this sub-surface variability that resulted ~~into an~~  
322 anomalous deepening of MLD. The Highest power of this signal was associated within 0-15 m  
323 with the magnitude of  $0.84 \text{ m}^2 \text{ s}^{-1}$  in zonal baroclinic current and within 0-38 m with the magnitude  
324 of  $0.76 \text{ m}^2 \text{ s}^{-1}$ . These signals, however, weaken with increasing depth and almost disappeared  
325 around 120 m depth. These NIO ~~were are~~ the strongest signals at the 14 m depth that and  
326 ~~dominating dominated~~ the mixing compared to any process other than local wind stress. by any

~~other process than the local wind stress. Other processes include the background flows, the presence of eddies, variations in sea surface height, non-linear wave-wave and wave-current interactions (Guan et al., 2014; Park and Watts, 2005).~~

In order to analyze the time distribution of the strong NIO, wavelet transform analysis was applied on the zonal and meridional baroclinic currents at 14 m depth. The Scalogram, shown in Figure 67, depicts the generation of NIO signal on 12<sup>th</sup> October that subsequently got strengthen and attains its peak value on the mid of 13<sup>th</sup> October. The energy percentage of the meridional component was always lower than the zonal component. The peak values of energy percentage was found in the time periods between 25-28 hr marked with a white dashed line in Figure 6. A Butterworth 2<sup>nd</sup> order band-pass filter was applied at the corresponding cutoff frequency interval of 0.033 - 0.043 to filter the NIO signal of the baroclinic zonal and meridional currents. Figure 78 shows profiles of near-inertial zonal ( $U_i$ ) and meridional ( $V_i$ ) baroclinic currents together with the kinetic energy ( $E_i$ ) of near-inertial flow. The maximum strength of inertial baroclinic current was 0.3 m s<sup>-1</sup> with the signature of an alternate directional reversal of current signals. Presence of these inertial currents were up to 70 m depth with the peak value of kinetic energy  $E_i$  being 0.048 m<sup>2</sup> s<sup>-2</sup>. Stronger (>0.5 m s<sup>-1</sup>) zonal and meridional baroclinic currents were observed up to 40 m depth. It can be noticed from Figure 78c, the baroclinic kinetic energy remains higher (> 0.03 m<sup>2</sup> s<sup>-2</sup>) only from mid of 11<sup>th</sup> October until the end of 12<sup>th</sup> October and decreased rapidly thereafter. The energy rapidly decreases and almost disappeared after 13<sup>th</sup> October. This indicates the period of prominent mixing due to NIO was 11-12 October 2013. The baroclinic kinetic energy almost ceased after 13<sup>th</sup> October. The daily averaged values of baroclinic kinetic energy (not shown here) also confirms the maxima in  $E_i$  on 11-12 October with the vertical extent up to 80 m depth.

### 3.3.3. Role of downward propagation of energy

To investigate the energy propagation from the surface to the interior layers of upper-ocean, we derived the rotary spectra of near-inertial wave numbers and shown in Figure 89. The daily averaged vertical wave-number rotary spectra provides a clear picture of wind energy distribution in the sub-surface water. The anticyclonic spectrum ( $A_m$ ) is dominating over the cyclonic spectra ( $C_m$ ) for the entire duration of the cyclone. This feature indicates that the energy is propagating downward generated by these inertial oscillations. The magnitude of these oscillations increased from initial stage up to 12<sup>th</sup> October and remained at high energy density for

Formatted: Superscript

Formatted: Superscript

Formatted: Subscript

Formatted: Subscript

357 the rest of the cyclone period. This downward directed energy initiated a process of mixing  
358 between the mixed layer and the thermocline. This energy helps to deepen the mixed layer against  
359 oceanic stratification by introducing a strong shear. The buoyancy of stratified ocean was  
360 overcome to some extent by the shear generated that assist in mixing process during the very severe  
361 cyclone. For the current case, kinetic energy (Figure 78c) represents the analogical behavior as  
362 reported by Alford and Gregg (2001). Their study highlighted that, in most of the cases, the energy  
363 of inertial oscillations potentially penetrates the mixed layer but suddenly drops down as it touches  
364 the thermocline. The energy dissipation mechanism studied in few other studies (Chant, 2001;  
365 Jacob, 2003).

366 The 2-layer model described by Burchard and Rippeth (2009) illustrated the process of  
367 generation of sufficient shear to start mixing near the thermocline. Their simple model ignored the  
368 effect of the lateral density gradient, mixing, and advection. Burchard et al. (2009) mentioned four  
369 important parameters for the shear generation, i.e. surface wind stress ( $P_s S^2$ ), bed stress ( $-D_b S^2$ ),  
370 interfacial stress ( $-D_i S^2$ ), and barotropic flow ( $P_m S^2$ ). Utilizing simulations from our coupled  
371 atmosphere-ocean-wave model, we calculated individual terms as suggested by Burchard et al.  
372 (2009) and presented in Figure 910. ~~It is clear from the figure that the surface wind stress term~~  
373 ~~plays most significant role~~ Surface wind stress found to be the most dominating term in modulating  
374 the magnitude of bulk shear during the stormy event. ~~Rest of the terms were~~ ~~Other terms were~~  
375 ~~found to be~~ relatively weaker and, therefore, contributing only marginally ~~in to~~ the variability of  
376 the bulk shear.

377 To examine the generation and dissipation of these inertial waves, the shear generated by  
378 the near-inertial baroclinic current ( $S_f^2$ ) and turbulent kinetic energy dissipation rate ( $\epsilon$ ) were  
379 calculated and analyzed. The shear produced by inertial oscillations ~~was increasing~~ increased at  
380 20-80 m depth from 40-80 m depth and higher magnitude was associated with peak wind speed of  
381 cyclone (Figure 10a11a). This shear overcome the stratification (Figure 10b11b), represented by  
382 buoyancy frequency  $N^2$ , and played important role in mixing and deepening of the thermocline  
383 and mixed layer on 12<sup>th</sup> October. ~~that was weak at this depth compared to the shear of the near-~~  
384 ~~inertial waves.~~ The value of kinetic energy dissipation rate ( $\epsilon$ ) increased from  $4 \times 10^{-14}$  to  $2.5 \times 10^{-$   
385 <sup>13</sup>  $W \text{ kg}^{-1}$  on approaching the thermocline (Figure 10e11c). The increase in  $\epsilon$  indicates the  
386 weakening of the shear generated by the inertial waves leading to the fast disappearance of these

Formatted: Superscript

Formatted: Superscript

387 baroclinic instabilities from the region. The non-linear interaction between the NIO and internal  
388 tides together with the prevailing background currents cause rapid dissipation of kinetic energy in  
389 the thermocline. Guan et al. (2014) also reported an accelerated dampening of NIO associated with  
390 the wave-wave interactions between NIO and internal tides. The background currents found to  
391 modify the propagation of NIO (Park and Watts, 2005). The magnitude of the turbulent eddy  
392 diffusivity ( $K_p$ ), shown in Figure 10d, implies that the greater mixing takes place within the  
393 mixed layer ~~place~~ where  $K_p$ -was high ( $6.3 \times 10^{-11}$  to  $1.2 \times 10^{-11} \text{ m}^2 \text{ s}^{-1}$ ). The daily averaged values  
394 of  $\epsilon$  and  $K_p$  were  $1.2 \times 10^{-13} \text{ W kg}^{-1}$  and  $1.5 \times 10^{-10} \text{ m}^2 \text{ s}^{-1}$ , respectively on 12<sup>th</sup> October, which were  
395 higher as compared to the initial two days of the cyclonic event. ~~Therefore,~~ Results from the  
396 present study, as well as the conclusions from the past studies, indicate that wave-current  
397 interaction, mesoscale processes, and wave-wave interaction can affect the process of downward  
398 mixing and cause the dissipation of inertial oscillations.

#### 399 4. Conclusions

400 Processes controlling the sub-surface mixing were evaluated under the high wind speed  
401 regime of a severe cyclonic storm Phailin over the BoB. A coupled atmosphere-ocean-wave  
402 (WRF+ROMS+SWAN) model as part of the COAWST modeling system was used to simulate  
403 atmospheric and oceanic conditions during the passage of Phailin cyclone. A detailed analysis of  
404 model simulated data revealed interesting features of generation, propagation, and dissipation of  
405 kinetic energy in the upper oceanic water column. Deepening of the MLD and thermocline by 15  
406 m and 40 m, respectively were explained through the strong shear generated by the inertial  
407 oscillations that helped to overcome the stratification and initiate mixing at the base of the mixed  
408 layer. However, there was a rapid dissipation of the shear with increasing depth below the  
409 thermocline. The peak magnitude of kinetic energy in baroclinic and barotropic currents found to  
410 be  $1.2 \text{ m}^2 \text{ s}^{-2}$  and  $0.3 \times 10^{-2} \text{ m}^2 \text{ s}^{-2}$ , respectively. The power spectrum analysis suggested a dominant  
411 frequency operative in sub-surface mixing that was associated with near-inertial oscillations. The  
412 peak strength of  $0.84 \text{ m}^2 \text{ s}^{-1}$  in the zonal baroclinic current found at 14 m depth at a location in  
413 northwestern BoB. The baroclinic kinetic energy remains higher ( $> 0.03 \text{ m}^2 \text{ s}^{-2}$ ) during 11-12  
414 October and decreased rapidly thereafter. The wave-number rotary spectra identified the  
415 downward propagation, from the surface up to the thermocline, of energy generated by inertial  
416 oscillations. A quantitative analysis of shear generated by the near-inertial baroclinic current

417 showed higher shear generation at 20-80 m depth during peak surface winds. Analysis highlights  
418 that greater mixing within the mixed layer takes place where the eddy kinetic diffusivity was high  
419 ( $> 6 \times 10^{-11} \text{ m}^2 \text{ s}^{-1}$ ). The turbulent kinetic energy dissipation rate increased from  $4 \times 10^{-14}$  to  $2.5 \times 10^{-13}$   
420  $\text{W kg}^{-1}$  on approaching the thermocline that dampened mixing process further down into the  
421 thermocline layer. Kinetic energy associated with baroclinic currents were about two order of  
422 magnitudes higher than in barotropic component. The peak strength of  $0.84 \text{ m}^2 \text{ s}^{-1}$  in zonal  
423 baroclinic current was found at 14 m depth at a location in northwestern BoB. The wave-current  
424 interaction, mesoscale processes, and wave-wave interaction increased the dissipation rate of shear  
425 and, thereby, limited the downward mixing up to the thermocline. were found to affect the process  
426 of downward mixing and cause the dissipation of inertial oscillations. The coupled model found  
427 to be a useful tool to investigate air-sea interaction, kinetic energy propagation, and mixing in the  
428 upper ocean and oceanic sub surface processes.

429

430 **Author contribution:** KRP and TN performed model simulations and analyzed data. VP prepared  
431 the manuscript with contributions from all co-authors.

#### 432 **Acknowledgements**

433 ECCO2 is a contribution to the NASA Modeling, Analysis, and Prediction (MAP)  
434 program. The study benefitted from the funding support from Ministry of Earth Sciences, Govt. of  
435 India and Space Applications Centre, Indian Space Research Organisation. High Performance  
436 Computing (HPC) facility provided by IIT Delhi and Department of Science and Technology  
437 (DST), Govt. of India are thankfully acknowledged. Authors are thankful to Dr. Lingling Xie for  
438 his productive suggestions. Graphics generated in this manuscript using Ferret and NCL. TN and  
439 KRP acknowledge MoES and UGC-CSIR, respectively for their doctoral fellowship support.

440

441

442

443

444

445  
446  
447  
448  
449  
450

451

452 **References**

- 453 Alam, M. M., Hossain, M.A. and Shafee, S.: Frequency of Bay of Bengal cyclonic storms and  
454 depressions crossing different coastal zones, *Int. J. Climatol.*, 23, 1119–1125,  
455 doi:10.1002/joc.927, 2003.
- 456 Alford, M.H., Gregg, M.C.: Near-inertial mixing: modulation of shear, strain and microstructure  
457 at low latitude. *J. Geophys. Res.* 106 (C8), 16947–16968, 2001.
- 458 Booij, N., Ris, R. C., and Holthuijsen, L. H.: A third-generation wave model for coastal regions,  
459 Part I, Model description and validation, *J. Geophys. Res.*, 104(C4), 7649–7666,  
460 doi:10.1029/98JC02622, 1999.
- 461 Burchard, H., Rippeth, T.P.: Generation of bulk shear spikes in shallow stratified tidal seas. *J.*  
462 *Phys. Oceanogr.* 39, 969–985, 2009.
- 463 Chang, J., Chung, C.-C., Gong, G.-C.: Influences of cyclones on chlorophyll-a concentration and  
464 *Synechococcus* abundance in a subtropical western Pacific coastal ecosystem. *Mar. Ecol. Prog.*  
465 *Ser.* 140, 199–205, 2008.
- 466 Chang, S. W., and Anthes, F.A.: The mutual response of the tropical cyclone and the ocean. *J.*  
467 *Phys. Oceanogr.*, 9, 128–135, 1979.
- 468 Chant, R.J.: Evolution of near-inertial waves during an upwelling event on the New Jersey Inner  
469 Shelf. *J. Phys. Oceanogr.* 31, 746–764, 2001.



470 Chassignet, E.P., Arango, H.G., Dietrich, D., Ezer, T., Ghil, M., Haidvogel, D.B., Ma, C.C.,  
471 Mehra, A., Paiva, A.M., Sirkes, Z.: DAMEE-NAB: the base experiments. *Dyn. Atmos. Oceans*  
472 32, 155–183, 2000.

473 Cione, J. J., and Uhlhorn, E.W.: Sea surface temperature variability in hurricanes: Implications  
474 with respect to intensity change, *Mon. Weather Rev.*, 131, 1783–1796, doi:10.1175//2562.1,  
475 2003.

476 Dudhia, J.: Numerical study of convection observed during the winter monsoon experiment  
477 using a mesoscale two dimensional model. *J Atmos Sci*, 46, 3077–3107, 1989.

478 Gill, A. E.: On the behavior of internal waves in the wake of storms, *J. Phys. Oceanogr.*, 14, 1129  
479 – 1151, 1984.

480 Gonella, J.: A study of inertial oscillations in the upper layers of the oceans. *Deep-Sea Res.*, 18,  
481 775–788, 1971.

482 [Guan, S., Zhao, W., Huthnance, J. Tian, J., and Wang, J.: Observed upper ocean response to](#)  
483 [typhoon Megi \(2010\) in the Northern South China Sea. \*J. Geophys. Res. Oceans\*, 119, 3134–](#)  
484 [3157, doi:10.1002/2013JC009661, 2014.](#)

485 Haidvogel, D.B., Arango, H.G., Budgell, W.P., Cornuelle, B.D., Curchitser, E., Di Lorenzo, E.,  
486 Fennel, K., Geyer, W.R., Hermann, A.J., Lanerolle, L., Levin, J., McWilliams, J.C., Miller,  
487 A.J., Moore, A.M., Powell, T.M., Shchepetkin, A.F., Sherwood, C.R., Signell, R.P., Warner,  
488 J.C., Wilkin, J.: Regional ocean forecasting in terrain-following coordinates: model formulation  
489 and skill assessment. *Journal of Computational Physics* 227, 3595–3624, -2008.

490 Haidvogel, D.B., Arango, H.G., Hedstrom, K., Beckmann, A., Malanotte-Rizzoli, P.  
491 Shchepetkin, A.F.: Model evaluation experiments in the North Atlantic Basin: Simulations in  
492 nonlinear terrain-following coordinates. *Dyn Atmos Oceans* 32, 239–281, 2000.

493 Hong, S.Y., Lim, J.O.J.: The WRF single-moment 6-class microphysics scheme (WSM6). *J*  
494 *Korean Meteor Soc* 42:2, 129-151, 2006.

495 IMD Report.: Very Severe Cyclonic Storm, PHAILIN over the Bay of Bengal (08-14 October  
496 2013) A Report. India Meteorological Department, Technical Report, October 2013.

497 Jacob, S.D., Shay, L.K.: The role of oceanic mesoscale features on the tropical cyclone-induced  
498 mixed layer response: A case study. *J. Phys. Oceanog.*, 33, 649- 676, 2003.

499 Jacob, R., Larson, J., Ong, E.: M x N Communication and Parallel Interpolation in CCSM Using  
500 the Model Coupling Toolkit. Preprint ANL/MCSP1225-0205. Mathematics and Computer  
501 Science Division, Argonne National Laboratory, 25 pp, 2005.

502 Johnston, T.M.S., Chaudhuri, D., Mathur, M., Rudnick, D.L., Sengupta, D., Simmons, H.L.,  
503 Tandon, A., and Venkatesan, R.: Decay mechanisms of near-inertial mixed layer oscillations in  
504 the Bay of Bengal, *Oceanography*, 29(2): 180–191, doi:10.5670/oceanog.2016.50, 2016.

505 ~~Kirby, J. T., and Chen T.M.: Surface waves on vertically sheared flows: Approximate~~  
506 ~~dispersion relations, *J. Geophys. Res.*, 94(C1),1013–1027, doi:10.1029/JC094iC01p01013,~~  
507 ~~1989.~~

508 Kain, J.S.: The Kain-Fritsch convective parameterization: An update. *J Appl Meteor* 43, 170–  
509 181, 2004.

510 Kirby, J. T., and Chen T.M.: Surface waves on vertically sheared flows: Approximate  
511 dispersion relations.- *J. Geophys. Res.*, 94(C1),1013–1027, doi:10.1029/JC094iC01p01013,  
512 1989. 1989.

513 Komen, G.J., Hasselmann, S., and Hasselmann, K.: On the existence of a fully developed wind-  
514 sea spectrum. *J. Phys. Oceanogr.*, 14, 1271–1285. 1984.

515 Kumar VS, Nair A.M.: Inter-annual variations in wave spectral characteristics at a location off the  
516 central west coast of India. *Ann Geophys* 33:159–167, doi:10.5194/angeo-33-159, 2015.

517 Latha, T.P., Rao, K.H., Nagamani, P.V., Amminedu, E., Choudhury, S.B., Dutt, C.B.S., and  
518 Dadhwal, V.K.: Impact of Cyclone PHAILIN on chlorophyll-a concentration and productivity  
519 in the Bay of Bengal. *International Journal of Geosciences* 6:473–480,  
520 doi:10.4236/ijg.2015.65037, 2015.

521 Leipper, D. F.: Observed Ocean Conditions and Hurricane Hilda, 1964, *J. Atmos. Sci.*, 24, 182–  
522 186, doi:10.1175/1520-0469(1967) 0242.0.CO;2, 1967.

523 Zhi, Li., Yu, W., Li, T., Murty, V.S.N., and Tangang, F.: Bimodal character of cyclone  
524 climatology in the Bay of Bengal modulated by monsoon seasonal cycle. *J Climate* 26:1033-  
525 1046. doi: 10.1175/JCLI-D-11-00627.1, 2013.

526 Lin, I.I., Liu, W.T., Wu, C.C., Wong, T.F., Hu, C., Chen, Z., Liang, W.D., Yang, Y., Liu, K.K.:  
527 New evidence for enhanced ocean primary production triggered by tropical cyclone. *Geophys.*  
528 *Res. Lett.* 30 (13), doi:10.1029/2003GL017141, 2003.

529 Lin, I.I., Wu, C.C., Pun, I.F., Ko, D.S.: Upper ocean thermal structure and the western North  
530 Pacific category-5 typhoons. Part I: ocean features and category-5 typhoon's intensification.  
531 *Mon. Weather Rev.* 136, 3288–3306, 2008.

532 Longshore, D.: *Encyclopedia of Hurricanes, Typhoons, and Cyclones*, 468 pp., Checkmark, New  
533 York, 2008.

534 Larson, J., Jacob, R., Ong, E.: *The Model Coupling Toolkit: A New Fortran90 Toolkit for*  
535 *Building Multiphysics Parallel Coupled Models*. Preprint ANL/MCS- P1208-1204.  
536 Mathematics and Computer Science Division, Argonne National Laboratory, 25 pp, 2004.

537 Lukas, R., and Lindstrom, E.: The mixed layer of the western equatorial Pacific Ocean, *J. Geophys.*  
538 *Res.*, 96, 3343–3357, 1991.

539 ~~MacKinnon, J.A., Gregg, M.C.: *Mixing on the late summer New England Shelf — solibores, shear*  
540 *and stratification. J. Phys. Oceanogr.* 33 (7), 1476–1492, 2003.~~

541 ~~MacKinnon, J.A., Gregg, M.C.: *Spring Mixing: Turbulence and Internal Waves during*  
542 *Restratification on the New England Shelf. Journal of Physical Oceanography* 35:12, 2425-  
543 *2443 2005.*~~

544 Mandal M., Singh K. S., Balaji M., Mohapatra M.: Performance of WRF-ARW model in real-  
545 time prediction of Bay of Bengal cyclone ‘Phailin’. *Pure Appl. Geophys* DOI 10.1007/s00024-  
546 015-1206-7, 2015.

547 Monin, A.S., Obukhov, A.M.F.: Basic laws of turbulent mixing in the surface layer of the  
548 atmosphere. *Contrib Geophys Inst Acad Sci USSR* 151:163, e187, 1954.

549 National Centers for Environmental Prediction/National Weather Service/NOAA/U.S.  
550 Department of Commerce: NCEP FNL Operational Model Global Tropospheric Analyses,  
551 continuing from July 1999. Research Data Archive at the National Center for Atmospheric  
552 Research, Computational and Information Systems Laboratory. Dataset.  
553 <https://doi.org/10.5065/D6M043C6>, 2000.

554 Neetu, S., Lengaigne, M., Vincent, E.M., Vialard, J., Madec, G., Samson, G., Ramesh Kumar,  
555 M.R., and Durand, F.: Influence of upper-ocean stratification on tropical cyclone-induced  
556 surface cooling in the Bay of Bengal, *J. Geophys. Res.*, 117, C12020,  
557 doi:10.1029/2012JC008433, 2012.

558 Noh, Y., Cheon, W.G., Hong, S.Y., Raasch, S.: Improvement of the K-profile model for the  
559 planetary boundary layer based on large eddy simulation data. *Bound Layer Meteor* 107, 401–  
560 427, 2003.

561 Osborn, T.R.: Estimates of the Local-Rate of Vertical Diffusion from Dissipation Measurements.  
562 *J. Phys. Oceanogr.* 10, 83–89, 1980.

563 Palmer, M.R., Rippeth, T.P., Simpson, J. H.: An investigation of internal mixing in a seasonally  
564 stratified shelf sea. *J. Geophys. Res.* 113, C12005, doi:10.1029/2007JC004531, 2008.

565 Pant V, Girishkumar M.S., Udaya Bhaskar T.V.S., Ravichandran M., Papa F., Thangaprakash  
566 V.P.: Observed interannual variability of near-surface salinity in the Bay of Bengal, *J. Geophys.*  
567 *Res* 120(5):3315–3329, 2015.

568 [Park, J.H., and Watts, D. R.: Near-inertial oscillations interacting with mesoscale circulation in the](#)  
569 [southwestern Japan/East Sea. \*Geophys. Res. Lett.\*, 32, L10611, doi: 10.1029/2005GL022936,](#)  
570 [2005.](#)

571 Prakash K.R., Vimlesh Pant: Upper oceanic response to tropical cyclone Phailin in the Bay of  
572 Bengal using a coupled atmosphere-ocean model, *Ocean Dynamics*, 67, 51-64,  
573 doi:10.1007/s10236-016-1020-5, 2017.

574 Price, J. F., Mooers, C.N., and Van Leer, J.C.: Observation and simulation of storm-induced  
575 mixed-layer deepening. *J. Phys. Oceanogr.*, 8, 582-599, [https://doi.org/10.1175/1520-](https://doi.org/10.1175/1520-0485(1978)008<0582:OASOSI>2.0.CO;2)  
576 [0485\(1978\)008<0582:OASOSI>2.0.CO;2](https://doi.org/10.1175/1520-0485(1978)008<0582:OASOSI>2.0.CO;2), 1978.

577 Price, J.F.: Upper ocean response to a hurricane. *J. Phys. Oceanogr.*, 11, 153-175, 1981.

578 Rao, R. R., and Sivakumar, R.: Seasonal variability of sea surface salinity and salt budget of the  
579 mixed layer of the north Indian Ocean, *J. Geophys. Res.*, 108(C1), 3009,  
580 doi:10.1029/2001JC000907, 2003.

581 Sanford, T. B., Black, P.G., Haustein, J., Feeney, J.W., Forristall, G.Z., and Price, J.F.: Ocean  
582 response to a hurricane. Part I: Observations. *J. Phys. Oceanogr.*, 17, 2065–2083, 1987.

583 Sarangi, R. K.: Remote-sensing-based estimation of surface nitrate and its variability in the  
584 southern peninsular Indian waters, *Int. J. Oceanogr.*, doi:10.1155/2011/172731, 2011.

585 Shang, S., Li, L., Sun, F., Wu, J., Hu, C., Chen, D., Ning, X., Qiu, Y., Zhang, C., and Shang, S.,  
586 Changes of temperature and bio-optical properties in the South China Sea in response to  
587 Typhoon Lingling, (2001), *Geophys. Res. Lett.*, 35, L10602, doi:10.1029/2008GL033502,  
588 2008.

589 Schepetkin and A. F., McWilliams J. C.: The Regional Ocean Modeling System: A split-explicit,  
590 free-surface, topography following coordinates ocean model, *Ocean Modelling*, 9, 347-404,  
591 2005.

592 Skamarock, W.C., Klemp, J.B., Dudhia, J., Gill, D.O., Barker, D.M., Wang, W., Powers, J.G.:  
593 A Description of the Advanced Research WRF Version 2. NCAR Technical Note, NCAR/TN-  
594 468+STR., 2005.

595 Shay, L. K., Black, P., Mariano, A., Hawkins, J., and Elsberry, R.: Upper ocean response to  
596 hurricane Gilbert, *J. Geophys. Res.*, 97(20), 227–248, 1992.

597 Shay, L. K. and Elsberry, R.L.: Vertical structure of the ocean current response to a hurricane. *J.*  
598 *Phys. Oceanogr.*, 19, 649-669, 1989.

599 Shay, L. K., Goni, G.J., and Black, P.G.: Effects of a warm oceanic feature on Hurricane Opal,  
600 *Mon. Weather Rev.*, 128, 1366–1383, doi:10.1175/1520-0493(2000)1282.0.CO;2, 2000.

601 Shearman, R.K.: Observations of near-inertial current variability on the New England shelf. *J.*  
602 *Geophys. Res.* 110, C02012, doi:10.1029/2004JC002341, 2005.

603 Suzana, J Carmargo, Adam H Sobel, Anthony G Barnston and Kerry A. Emanuel: Tropical  
604 cyclone genesis potential index in climate models. *Tellus* 59A:428-443, 2007.

605 [Taylor, P.K., and Yelland, M.J.: The dependence of sea surface roughness on the height and](#)  
606 [steepness of the waves. \*J. Phys. Oceanogr.\*, 31, 572–590, 2001.](#)

Formatted: Justified

607  
608 Thadathil, P., Muraleedharan, P.M., Rao, R.R., Somayajulu, Y.K., Reddy, G.V., and  
609 Revichandran, C.: Observed seasonal variability of barrier layer in the Bay of Bengal, *J.*  
610 *Geophys. Res.*, 112, C02009, doi:10.1029/2006JC003651, 2007.

611 Varkey, M. J., Murty, V.S.N., and Suryanarayana, A.: Physical oceanography of the Bay of Bengal  
612 and Andaman Sea, *Oceanogr. Mar. Biol.*, 34, 1–70, 1996.

613 van der Lee, E.M., and Umlauf, L.: Internal wave mixing in the Baltic Sea: near-inertial waves in  
614 the absence of tides. *J. Geophys. Res.* 116, C10016, doi:10.1029/2011JC007072, 2011.

615 Vinayachandran, P. N., Murty, V.S.N., and Ramesh Babu V.: Observations of barrier layer  
616 formation in the Bay of Bengal during summer monsoon, *J. Geophys. Res.*, 107(C12), 8018,  
617 doi:10.1029/2001JC000831, 2002.

618 Vissa, N.K., Satyanarayana, A.N.V. and Prasad Kumar, B.: Intensity of tropical cyclones during  
619 pre- and post-monsoon seasons in relation to accumulated tropical cyclone heat potential over  
620 Bay of Bengal, *Nat Hazards* 68: 351. <https://doi.org/10.1007/s11069-013-0625-y>. 2013.

621 Warner, J. C., Sherwood, C.R., Arango, H.G., and Signell, R.P.: Performance of four turbulence  
622 closure models implemented using a generic length scale method, *Ocean Modell.*, 8, 81–113,  
623 doi:10.1016/j.ocemod.2003.12.003, 2005.

624 Warner, J.C., Armstrong B., He R., Zambon J.B.: Development of a coupled ocean–  
625 atmosphere–wave–sediment transport (COAWST) modeling system. *Ocean modelling* 35:230–  
626 244. doi:10.1016/j.oceanmod.2010.07.010, 2010.

627 Yanase, W., Satosh, M., Taniguchi, H., and Fujinami, H.: Seasonal and Intraseasonal Modulation  
628 of tropical cyclogenesis environment over the Bay of Bengal during the extended summer  
629 monsoon. *J Climate* 25:2914-2930. doi: 10.1175/JCLI-D-11-00208.1, 2012.

630 Zhang, S., Xie, L., Hou, Y., Zhao, H., Qi, Y., & Yi, X.: Tropical storm-induced turbulent mixing  
 631 and chlorophyll-a enhancement in the continental shelf southeast of Hainan Island. *Journal of*  
 632 *Marine Systems*, 129, 405-414, 2014.

633 Zhao, H., Tang, D.L., Wang, D.X.: Phytoplankton blooms near the Pearl River Estuary induced  
 634 by Typhoon Nuri. *J. Geophys. Res.* 114, C12027, doi:10.1029/2009JC005384, 2009.

635  
 636  
 637  
 638

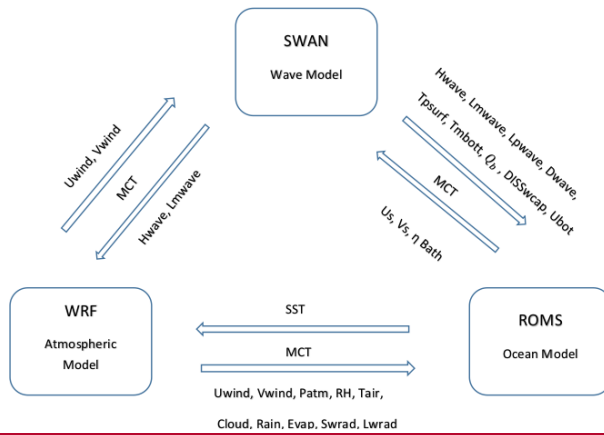

639  
 640 **Figure 1:-The block diagram showing the component models WRF, ROMS, and SWAN of the**  
 641 **COAWST modeling system together with the variables exchanged among the models. MCT- the**  
 642 **model coupling toolkit is a model coupler used in the COAWST system.**

Formatted: Justified

643  
 644  
 645  
 646  
 647  
 648

649  
650  
651  
652  
653  
654

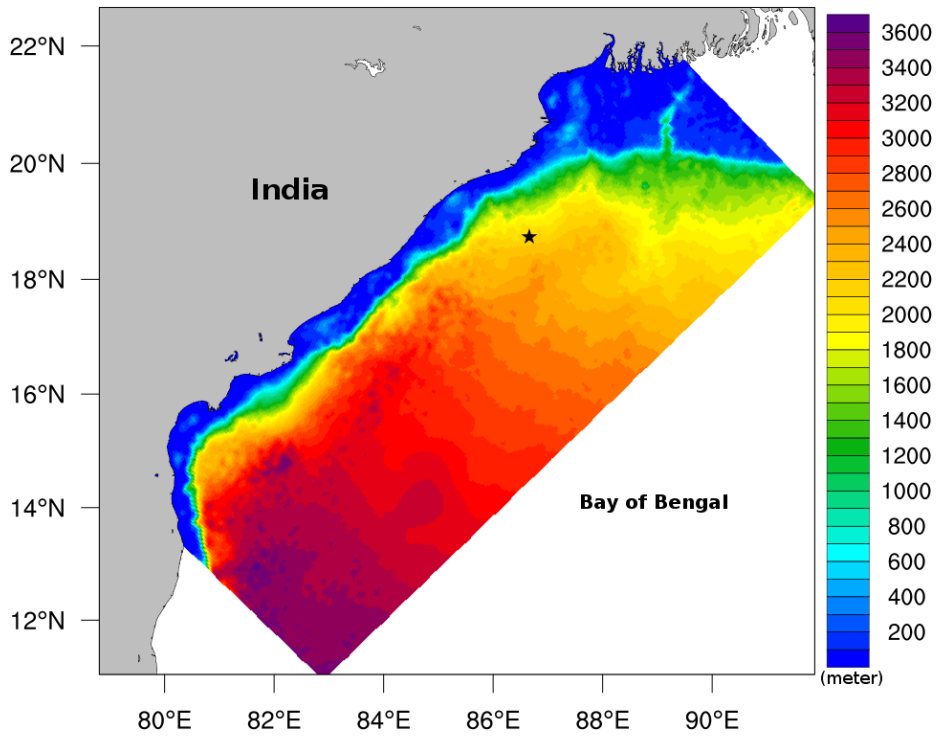

655



656 **Figure 24:-**COAWST model domain (65°-105 °E, 1°-34 °N) overlaid with GEBCO bathymetry (m).  
657 Location used for time-series analysis marked with a star.

658

659

660

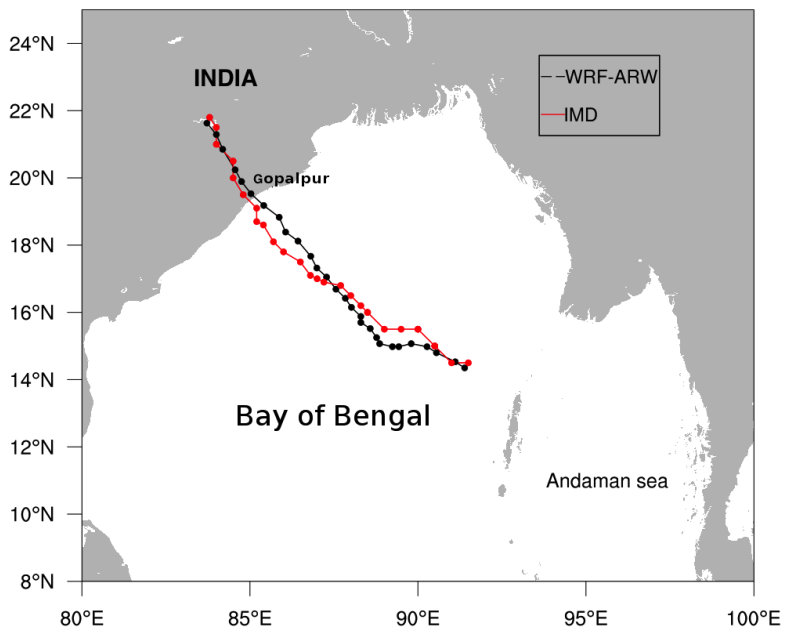

661

662 **Figure 32:-** Validation of VSCS Phailin track simulated by coupled model (black) with IMD  
663 reported track (red).

664

665

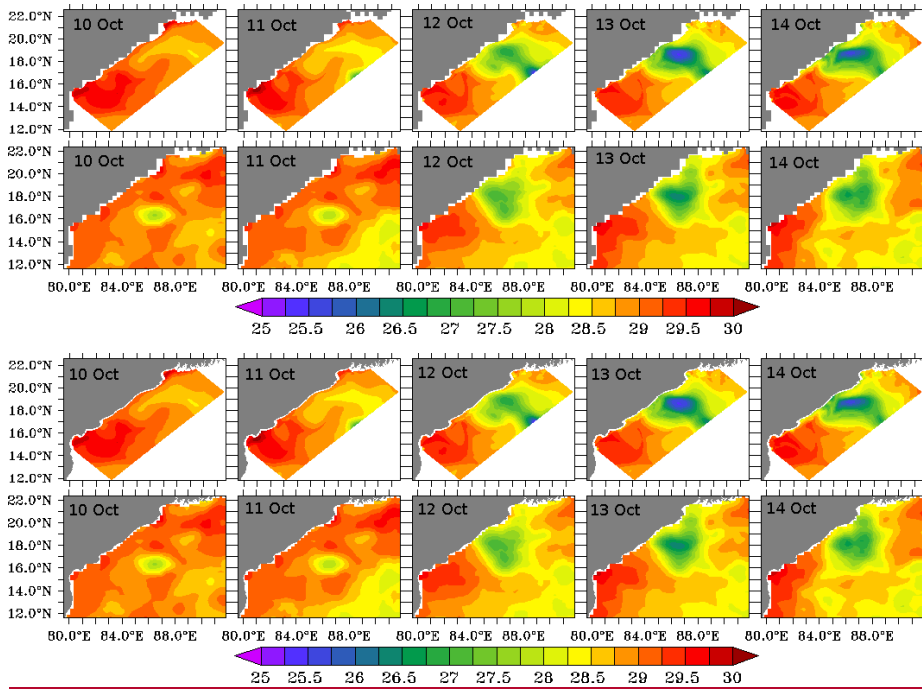

666

667

668 **Figure 43:-** Sea Surface Temperature (SST) in °C observed from AVHRR sensor on the satellite  
 669 (lower panel) and simulated by model (upper panel).

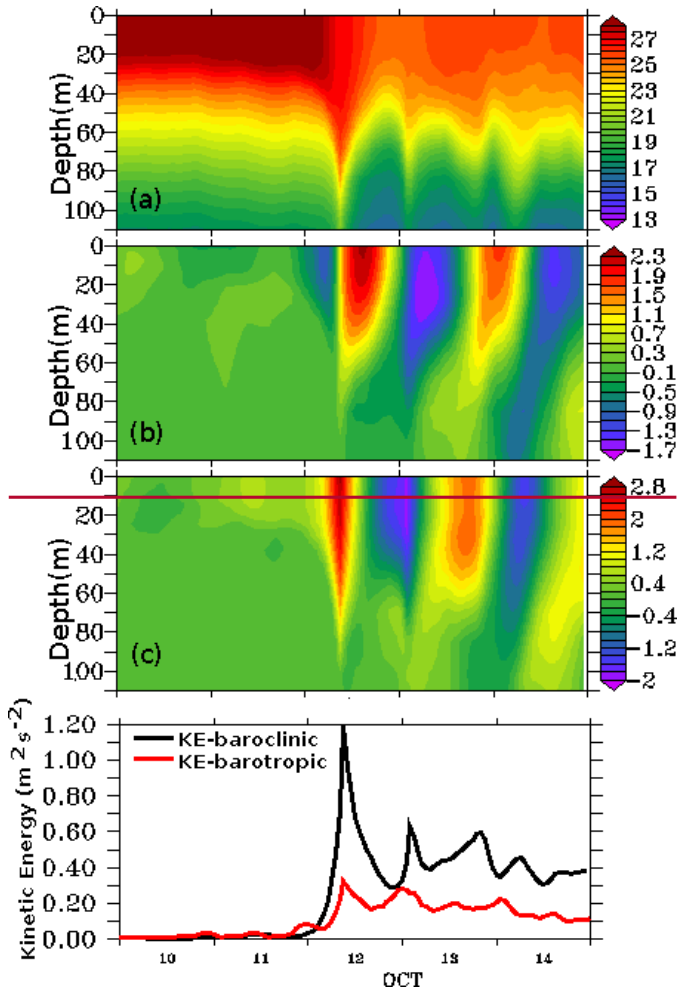

670

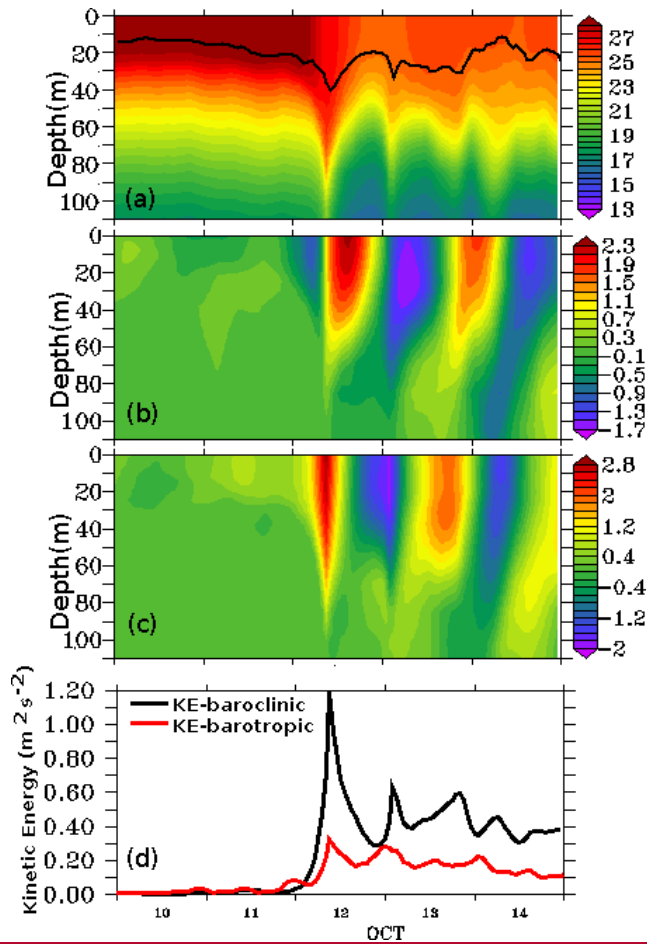

671

672 **Figure 54:-** The vertical profiles of temperature in  $^{\circ}\text{C}$  (a), zonal current in  $\text{m s}^{-1}$  (b), meridional  
 673 current in  $\text{m s}^{-1}$  (c). The kinetic energy ( $\text{m}^2 \text{s}^{-2}$ ) of baroclinic current (black) and barotropic current  
 674 ( $\times 10^{-2}$ ) (red) (d). The thick black line in (a) denotes the mixed layer depth.

675

676

677

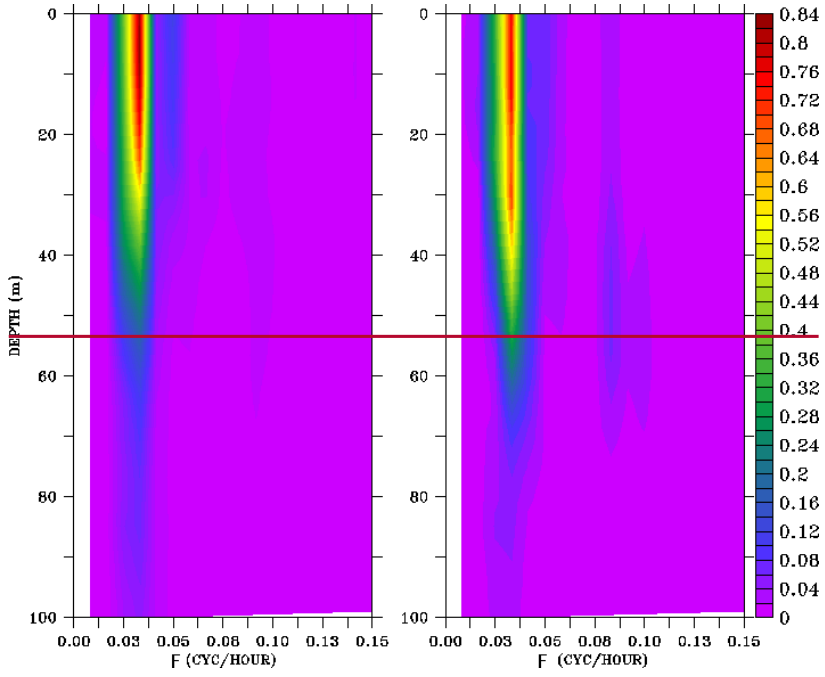

678

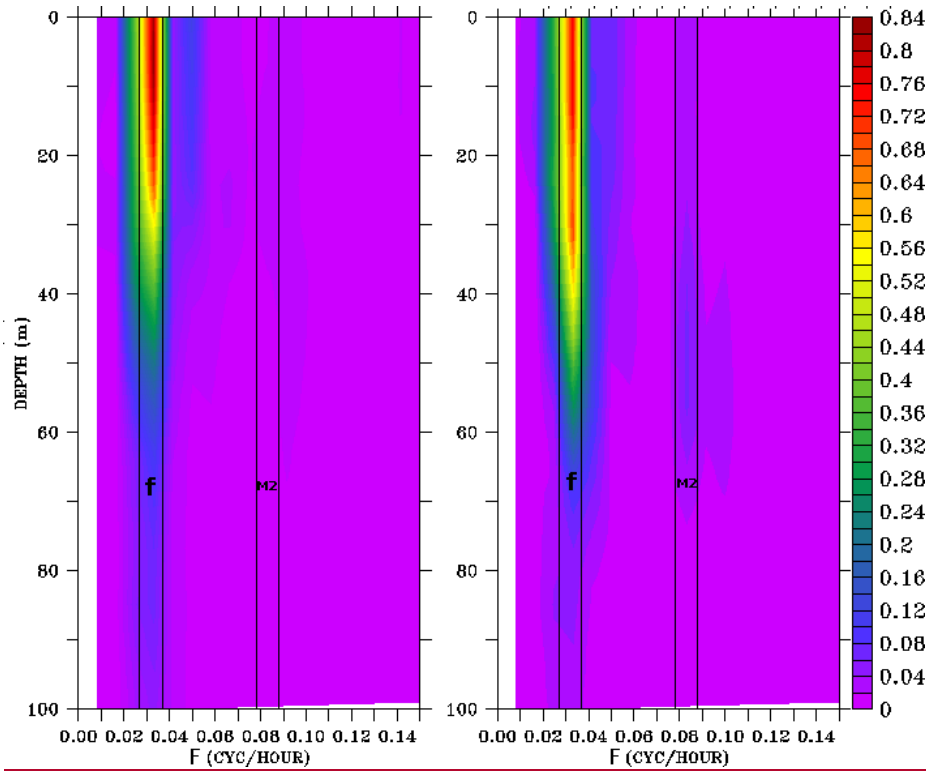

679

680 **Figure 65:-** The power spectrum analysis ( $m^2s^{-1}$ ) for a) baroclinic zonal current and b) baroclinic  
 681 meridional current

682

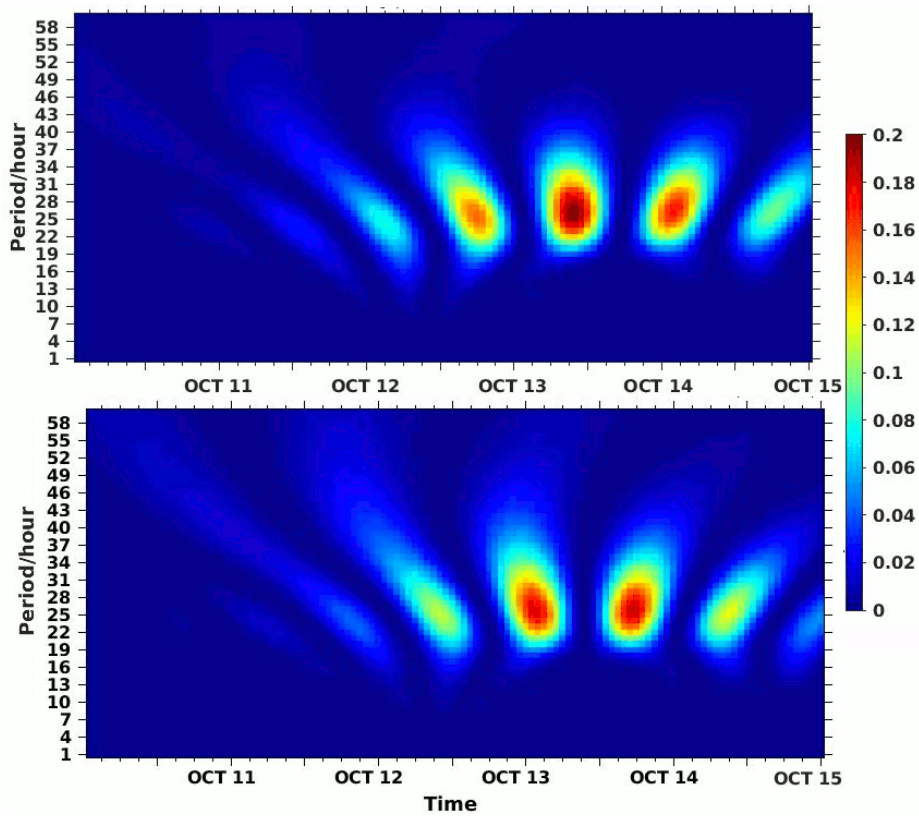

683  
 684 Figure 76:- The scalogram in percentage at 40 m depth by continuous wavelet transform (CWT)  
 685 method. Wavelet scalogram shown for the zonal baroclinic current (upper panel) and for the  
 686 meridional baroclinic current (lower panel). ~~The white dashed line indicates the peak percentage of~~  
 687 ~~energy.~~

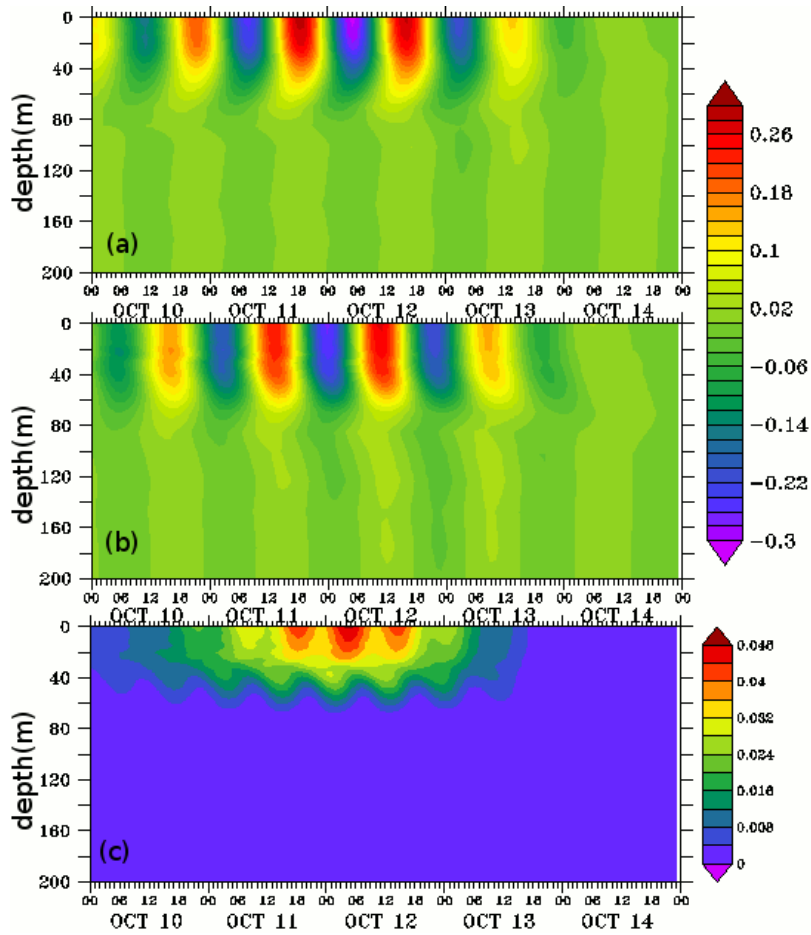

688  
 689 Figure 87:- The profiles of a) near inertial zonal baroclinic current ( $U_p$ ) b) near inertial meridional  
 690 current ( $V_p$ ) in  $m\ s^{-1}$  and c) Kinetic energy ( $E_p$ ) of near inertial flow in  $m^2s^{-2}$

691  
 692  
 693  
 694  
 695  
 696



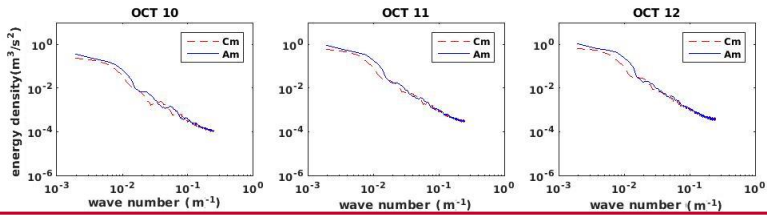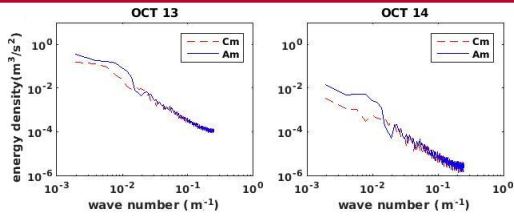

697

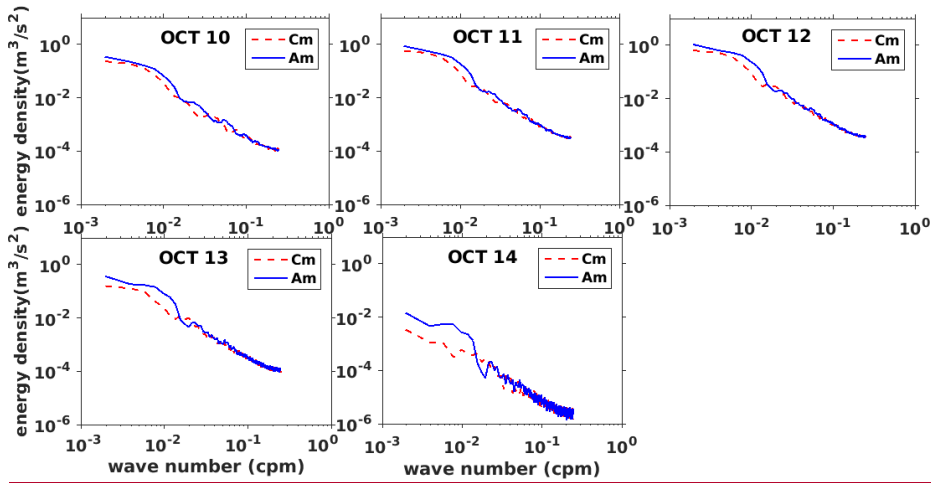

698

699 **Figure 98:-** The daily averaged vertical wave-number rotary spectra of near inertial oscillations.  
 700 The anticyclonic and cyclonic spectra are represented in blue and dotted red lines respectively.

701

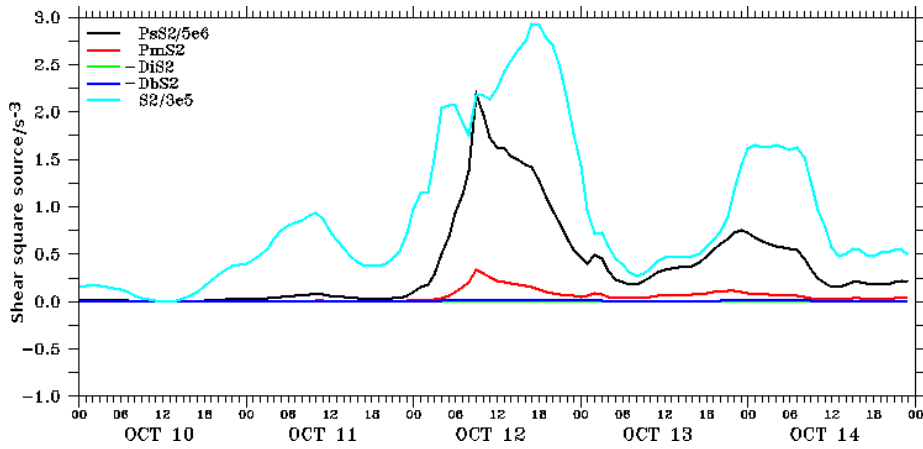

702

703 **Figure 109:-** The model simulated bulk properties at the selected point location. The vertical shear  
704 square axis is multiplied with a factor of  $10^{-6}$ . The magnitude of bulk shear squared  $S^2$  (cyan color),  
705 surface wind stress  $P_s S^2$  (black color), barotropic effect  $P_m S^2$  (red color), bottom stress  $-D_b S^2$  (blue  
706 color), interfacial friction  $-D_i S^2$  (green color)

707

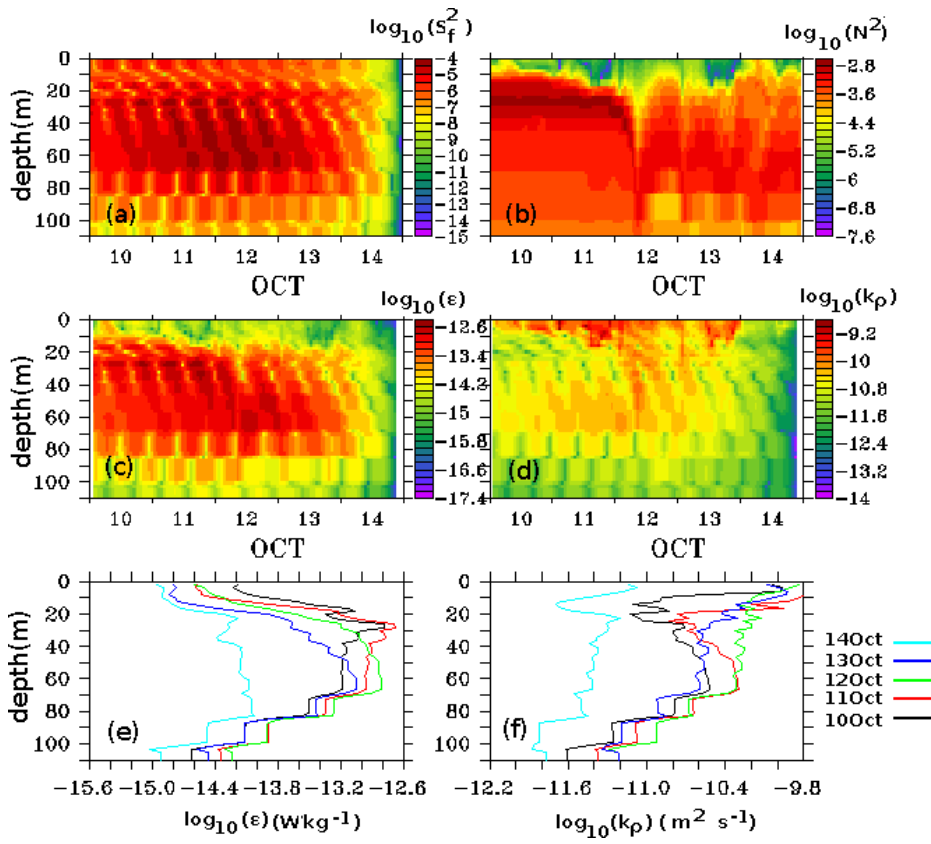

708  
 709 **Figure 1140:-** Profiles of a) velocity shear  $\log_{10}(S_f^2)$ , b) buoyancy frequency  $\log_{10}(N^2)$ , c) turbulent  
 710 kinetic energy dissipation rate  $\log_{10}(\epsilon)$ , d) turbulent eddy diffusivity  $\log_{10}(K_p)$ , e) and f) are daily  
 711 averaged turbulent kinetic energy dissipation rate and turbulent eddy diffusivity respectively

712
